# Supplementary material for: Tandem RCM-Pauson–Khand reaction for access to tricycles in one stepElectronic supplementary information (ESI) available: spectral data and 1H-NMR and 13C-NMR spectra for compounds 8, 10, 11, 14a and 14b. See http://www.rsc.org/suppdata/ob/b3/b302277c
Source: Royal Society of Chemistry journal article supplement (doi:10.1039/b302277c), 2003-04-04
Supplement: b302277c.doc [file b302277c.doc]

Tandem RCM-Pauson-Khand reaction for access to tricycles in one step

Marta Rosillo, Luis Casarrubios, Gema Domínguez, Javier Pérez-Castells*

Departamento de Química, Facultad de CC. Experimentales y de la Salud, Universidad San Pablo-CEU, Boadilla del Monte 28668-Madrid. SPAIN.

Email Address jpercas@ceu.es

**(4a*S**, 7a*R**, 7b*R**)-4a,5,6,7,7a,7b-Hexahydro-2*H*-indeno[7,1-*bc*]furan-4-one, 8**

**1H-RMN (CDCl3):** 0.99-1.26 (m, 3H), 1.57-1.61 (m, 1H), 1.83-1.91 (m, 1H), 1.96-2.05 (m, 1H), 2.83-2.91 (m, 1H), 3.35 (t, 1H, J=7.2 Hz), 4.34-4.42 (m, 1H), 4.57-4.70 (m, 2H), 5.97 (s, 1H). **13C-RMN (CDCl3):** 213.2, 182.0, 121.8, 75.2, 64.6, 47.5, 46.7, 28.6, 25.3, 21.0. Anal. calcd. for C10H12O2: C, 73.15; H, 7.37; found: C, 73.01; H, 7.25.

**(4a*S**, 8a*R**, 8b*R**) and (4a*S**, 8a*S**, 8b*R**)-5,6,7,8,8a,8b-Hexahydro-2*H*, 4a*H*-1-oxa-cyclopenta[*cd*]azulen-4-one, 10.**

**1H-RMN (CDCl3):** 1.00-1.40 (m, 6H), 1.56-1.77 (m, 4H), 1.92-2.23 (m, 6H), 2.55-2.64 (m, 1H), 2.72 (q, 1H, J=6.0 Hz), 3.06 (bt, 1H, J=8.8 Hz), 3.37 (td, 1H, J1=11.2 Hz; J2= 1.6Hz), 3.59 (bt, 1H, J=6.6 Hz), 4.30-4.37 (m, 1H), 4.51-4.64 (m, 3H), 4.73 (d, 1H, J=15.4 Hz), 6.02 (s, 1H), 6.17 (s, 1H). **13C-RMN (CDCl3):** 211.5, 210.4, 183.4, 183.0, 124.9, 124.6, 81.2, 79.9, 77.7, 66.2, 63.8, 63.5, 56.2, 53.0, 48.4, 46.2, 37.5, 32.9, 27.1, 27.0, 26.4, 24.1.

**3-Hex-5-enyl-3a,4-dihydro-1*H*,3*H*-cyclopenta[*c*]furan-5-one, 11**

**1H-RMN (CDCl3):** 1.25-1.49 (m, 4H), 1.66-1.83 (m, 2H), 2.06-2.16 (m, 3H), 2.61 (dd, 1H, J1=17.6 Hz; J2=6.0Hz), 2.86-2.88 (m, 1H), 3.39-3.47 (m, 1H), 4.55 (d, 1H, J=15.9 Hz) 4.73 (d, 1H, J=15.9 Hz), 4.93-5.04 (m, 2H), 5.73-5.87 (m, 1H), 6.03 (s, 1H). **13C-RMN (CDCl3):** 208.7, 185.0, 138.4, 124.0, 114.4, 83.1, 65.7, 50.6, 39.0, 34.0, 33.4, 28.6,24.9. Anal. calcd. for C13H18O2: C, 75.69; H, 8.80; found: C, 75.84; H, 8.89.

**(4a*S**, 8a*S**, 8b*R**)-4-Oxo-4,4a,5,6,7,8,8a,8b-octahydro-2*H*-azuleno[8,1-*bc*]pyrrole-1-carboxylic acid *tert*-butyl ester, 14a**

**1H-RMN (CDCl3):** 1.20-1.48 (m, 4H), 1.48 (s, 9H), 1.87-1.91 (m, 1H), 1.98-2.05 (m, 1H), 2.11-2.19 (m, 1H), 2.54-2.62 (m, 1H), 3.01-3.11 (m, 3H), 4.29 (bs, 2H), 5.94 (s, 1H). **1H-RMN (DMSO-d6):** 1.10-1.40 (m, 4H), 1.40 (s, 9H), 1.68-2.00 (m, 3H), 2.50-2.60 (m, 1H), 2.90-2.95 (m, 1H), 3.03-3.10 (m, 1H), 3.17-3.22 (m, 1H), 4.22-4.34 (m, 2H), 5.94 (s, 1H). **13C-RMN (CDCl3):** 210.2, 176.3, 156.0, 124.7, 80.2, 62.2, 56.6, 49.5, 47.2, 33.4, 28.4, 27.9, 27.5, 26.2. Anal. calcd. for C16H23O3N: C, 69.29; H, 8.36; N, 5.05; found: C, 69.37; H, 8.67; N, 4.99.

**(4a*S**, 8a*R**, 8b*R**)-4-Oxo-4,4a,5,6,7,8,8a,8b-octahydro-2*H*-azuleno[8,1-*bc*]pyrrole-1-carboxylic acid *tert*-butyl ester, 14b. 2 rotamers.**

**1H-RMN (CDCl3):** 0.97-1.47 (m, 4H), 1.47 (s, 9H), 1.60-1.75 (m, 2H), 1.76-1.93 (m, 1H), 2.10-2.30 (m, 1H), 2.65-2.75 (m, 1H), 3.49 (q, 1H, J=8.2 Hz), 4.09-4.33 (m, 3H), 6.14, 6.18 (s, 1H). **13C-RMN (CDCl3):** 211.2, 211.3, 180.1, 179.6, 153.7, 153.3, 126.3, 126.1, 80.0, 60.4, 59.7, 52.5, 51.9, 47.1, 45.7, 45.2, 28.4, 28.4, 28.0, 27.9, 26.3, 25.8. Anal. calcd. for C16H23O3N: C, 69.29; H, 8.36; N, 5.05; found**:** C, 69.53; H, 8.49; N, 4.97.

**1H-RMN** (CDCl3). **8**

**13C-RMN** (CDCl3). **8**

**1H-RMN** (CDCl3). **10**

**13C-RMN** (CDCl3). **10**

**1H-RMN** (CDCl3). **11**

**13C-RMN** (CDCl3). **11**

**1H-RMN** (CDCl3). **14a**

**1H-RMN** (DMSO-d6). **14a**

**13C-RMN** (CDCl3). **14a**

**1H-RMN** (CDCl3). **14b**

**13C-RMN** (CDCl3). **14b**
